# Supplementary material
Source: publisher figshare collection journal article supplement (https://tandf.figshare.com/ndownloader/files/20024339)
Supplement: Supplementary file 1 [file 20024339]

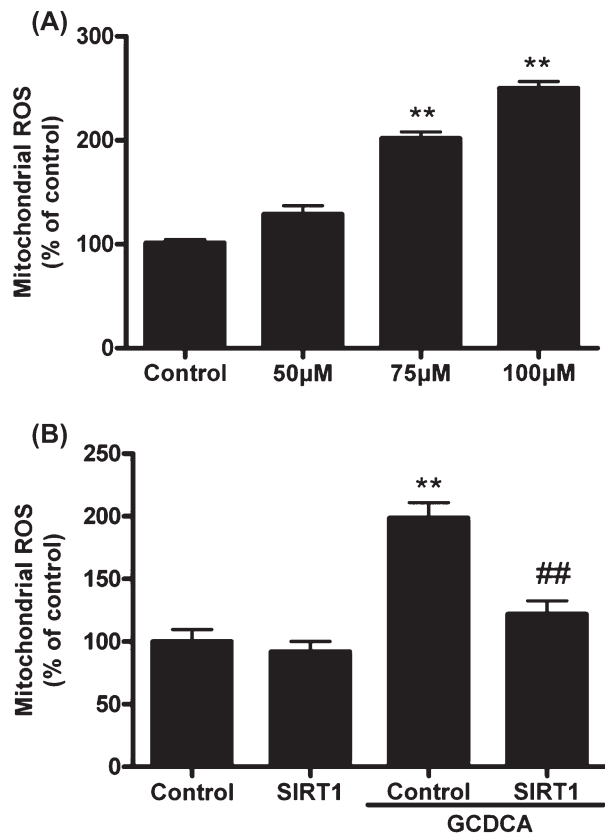

Supplementary Figure 1. GCDCA exposure increases mitochondrial ROS production (A) and the GCDCA-stimulated mitochondrial ROS inhibited by SIRT1 overexpression (B). The results are expressed as a percentage of the control, which was set at 100%. The values are presented as the means  $\pm$  SEM, \*\* $p$  < 0.01 versus the control group, and ## $p$  < 0.01 versus the GCDCA (75  $\mu$ M) group ( $n$  = 6).

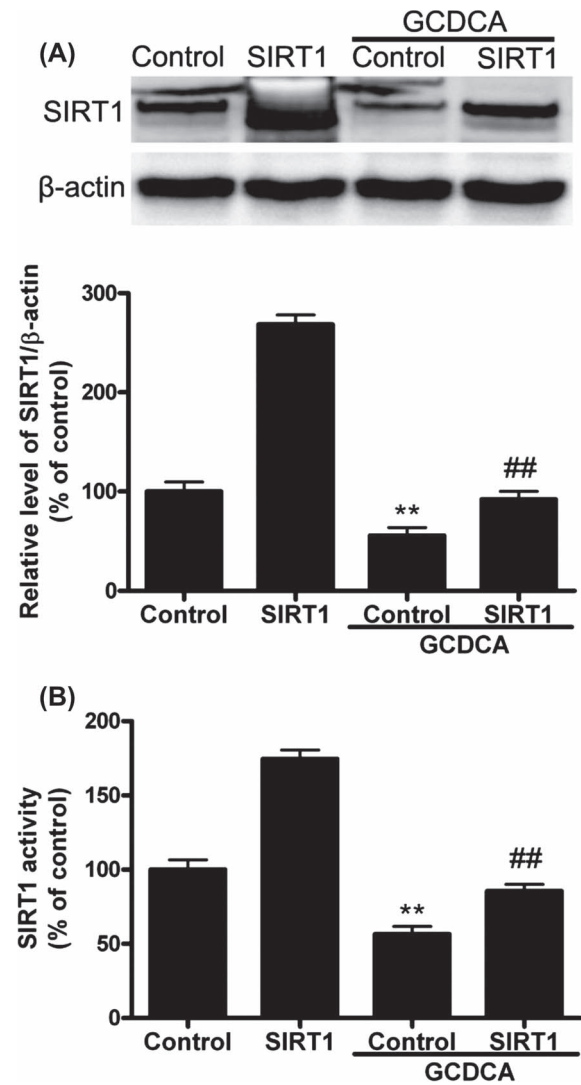

Supplementary Figure 2. SIRT1 overexpression successfully enhanced both GCDCA-inhibited SIRT1 protein activity and expression. (A) Representative immunoblot of SIRT1 protein levels (110 kDa) in L02 cells. (B) SIRT1 activity was measured based on an enzymatic reaction using a SIRT1 assay kit. The results are expressed as a percentage of the control, which was set at 100%. The values are presented as the means  $\pm$  SEM, \*\* $p$  < 0.01 versus the control group, and ## $p$  < 0.01 versus the GCDCA (75  $\mu$ M) group ( $n$  = 6).
